# Supplementary material for: Expanding of Life Strategies in Placozoa: Insights From Long-Term Culturing of Trichoplax and Hoilungia
Source: Front Cell Dev Biol. 2022 Feb 9;10:823283. doi: 10.3389/fcell.2022.823283 (PMC8864292; doi:10.3389/fcell.2022.823283)
Supplement: Supplementary file 13 [file Table1.XLSX]

## Sheet: Sheet1
Day	H1_1	H1_2	H1_3	H2_1	H2_2	H2_3	H13_1	H13_2	H13_3	H4_1	H4_2	H4_3
1	10	10	10	10	10	10	10	10	10	10	10	10
2	12	11	13	12	10	11	11	10	11	9	10	7
3	14	12	16	16	11	14	11	12	15	7	8	7
4	19	16	17	26	17	15	33	22	40	6	7	6
5	28	22	21	31	20	19	40	40	51	5	5	4
6	48	31	27	38	31	27	73	59	90	5	4	4
7	57	43	39	41	32	39	116	88	111	3	4	2
8	124	75	44	48	53	68	126	105	130	2	3	2
9	257	129	78	81	76	94	255	126	256	2	1	2
10	328	189	141	99	135	157	312	136	287	1	0	1
11	404	393	319	109	200	492	367	157	304	0	0	1
12	480	538	413	131	241	564	427	188	381	0	0	0
